# Supplementary material for: Diagnostic rates and treatment of dementia before and after launch of a national dementia policy: an observational study using English national databases
Source: HighWire-hosted journal article supplement (doi:10.1136/bmjopen-2013-004119), 2014-01-01
Supplement: bmjopen-2013-004119supp.pdf [file bmjopen-2013-004119supp.pdf]

**Data supplement: Primary Care Trust dementia diagnosis percentages (fiscal year)**

| Primary Care Trust                 | Percentage diagnosed with dementia |            |            |             |             |             |
|------------------------------------|------------------------------------|------------|------------|-------------|-------------|-------------|
|                                    | 2006/<br>7                         | 2007/<br>8 | 2008/<br>9 | 2009/<br>10 | 2010/<br>11 | 2011/<br>12 |
| ASHTON, LEIGH & WIGAN (5HG)        | 34.8                               | 37.1       | 36.0       | 37.6        | 39.1        | 42.2        |
| BARKING & DAGENHAM (5C2)           | 23.4                               | 25.4       | 25.7       | 27.5        | 28.8        | 29.9        |
| BARNET (5A9)                       | 46.6                               | 48.5       | 46.7       | 50.3        | 53.0        | 53.8        |
| BARNSELEY (5JE)                    | 36.0                               | 39.9       | 39.2       | 37.9        | 39.1        | 41.8        |
| BASSETLAW (5ET)                    | 40.4                               | 39.4       | 36.2       | 40.7        | 41.3        | 42.4        |
| BATH & NORTH EAST SOMERSET (5FL)   | 32.0                               | 31.2       | 30.0       | 32.3        | 33.5        | 34.2        |
| BEDFORDSHIRE (5P2)                 | 33.0                               | 34.6       | 33.9       | 37.2        | 39.1        | 40.1        |
| BERKSHIRE EAST (5QG)               | 32.2                               | 34.3       | 32.2       | 34.3        | 36.0        | 34.6        |
| BERKSHIRE WEST (5QF)               | 34.8                               | 34.5       | 34.4       | 35.6        | 37.3        | 38.8        |
| BEXLEY CARE TRUST (5ZX)            | 34.5                               | 34.2       | 32.6       | 32.0        | 33.4        | 33.5        |
| BIRMINGHAM EAST & NORTH (5PG)      | 33.0                               | 35.6       | 34.9       | 37.4        | 39.3        | 42.4        |
| BLACKBURN WITH DARWEN (5CC)        | 51.9                               | 51.3       | 49.7       | 51.5        | 55.3        | 54.4        |
| BLACKPOOL (5HP)                    | 31.8                               | 32.9       | 34.3       | 36.6        | 38.8        | 42.4        |
| BOLTON (5HQ)                       | 40.7                               | 40.5       | 38.5       | 41.0        | 42.7        | 47.7        |
| BOURNEMOUTH & POOLE TEACHING (5QN) | 44.7                               | 45.6       | 42.5       | 44.5        | 47.0        | 49.6        |
| BRADFORD & AIREDALE TEACHING (5NY) | 47.0                               | 47.6       | 45.5       | 48.0        | 50.4        | 51.7        |
| BRENT TEACHING (5K5)               | 34.5                               | 32.9       | 30.2       | 33.3        | 36.2        | 38.1        |
| BRIGHTON & HOVE CITY (5LQ)         | 30.3                               | 30.7       | 28.7       | 29.4        | 32.2        | 33.8        |
| BRISTOL (5QJ)                      | 36.2                               | 35.6       | 34.1       | 37.9        | 40.8        | 44.0        |
| BROMLEY (5A7)                      | 36.5                               | 36.7       | 34.5       | 35.0        | 36.9        | 37.0        |
| BUCKINGHAMSHIRE (5QD)              | 32.0                               | 31.5       | 29.2       | 32.2        | 33.3        | 35.1        |
| BURY (5JX)                         | 45.9                               | 44.7       | 41.8       | 42.9        | 44.1        | 44.0        |
| CALDERDALE (5J6)                   | 37.0                               | 37.6       | 36.3       | 37.3        | 39.4        | 42.3        |
| CAMBRIDGESHIRE (5PP)               | 33.7                               | 34.0       | 32.6       | 35.5        | 36.8        | 39.2        |
| CAMDEN (5K7)                       | 36.6                               | 40.8       | 39.7       | 42.0        | 45.6        | 47.2        |
| CENTRAL & EASTERN CHESHIRE (5NP)   | 37.2                               | 38.1       | 38.2       | 39.8        | 41.9        | 44.2        |
| CENTRAL LANCASHIRE (5NG)           | 38.0                               | 38.2       | 36.9       | 37.9        | 40.0        | 43.6        |
| CITY & HACKNEY TEACHING (5C3)      | 30.6                               | 31.4       | 28.4       | 29.6        | 32.2        | 35.9        |
| CORNWALL & ISLES OF SCILLY (5QP)   | 32.2                               | 32.5       | 32.9       | 38.6        | 39.9        | 42.0        |
| COUNTY DURHAM (5ND)                | 40.7                               | 40.3       | 38.9       | 43.3        | 45.0        | 47.8        |
| COVENTRY TEACHING (5MD)            | 37.2                               | 36.7       | 35.5       | 39.5        | 42.4        | 45.4        |
| CROYDON (5K9)                      | 38.4                               | 38.9       | 36.9       | 39.2        | 40.2        | 41.4        |
| CUMBRIA TEACHING (5NE)             | 42.2                               | 43.6       | 41.4       | 44.0        | 45.6        | 47.1        |
| DARLINGTON (5J9)                   | 45.0                               | 47.1       | 46.0       | 49.7        | 51.6        | 54.9        |
| DERBY CITY (5N7)                   | 36.0                               | 37.5       | 34.1       | 37.4        | 41.0        | 44.4        |
| DERBYSHIRE COUNTY (5N6)            | 35.5                               | 36.1       | 34.4       | 35.8        | 37.4        | 39.3        |
| DEVON (5QQ)                        | 28.4                               | 29.0       | 27.8       | 29.2        | 30.6        | 32.6        |

|                                       |      |      |      |      |      |      |
|---------------------------------------|------|------|------|------|------|------|
| DONCASTER (5N5)                       | 42.7 | 41.5 | 41.2 | 44.0 | 46.9 | 50.0 |
| DORSET (5QM)                          | 26.0 | 25.6 | 25.0 | 24.9 | 26.5 | 27.0 |
| DUDLEY (5PE)                          | 31.3 | 33.4 | 30.5 | 34.1 | 35.8 | 37.7 |
| EALING (5HX)                          | 39.5 | 38.2 | 36.2 | 41.3 | 43.9 | 45.5 |
| EAST LANCASHIRE TEACHING (5NH)        | 40.6 | 40.5 | 36.5 | 38.3 | 40.6 | 42.6 |
| EAST RIDING OF YORKSHIRE (5NW)        | 24.7 | 25.8 | 24.2 | 26.1 | 27.4 | 29.3 |
| EAST SUSSEX DOWNS & WEALD (5P7)       | 29.1 | 31.2 | 30.9 | 32.9 | 33.9 | 35.7 |
| EASTERN & COASTAL KENT (5QA)          | 32.1 | 32.4 | 30.7 | 33.1 | 35.1 | 35.8 |
| ENFIELD (5C1)                         | 31.1 | 32.3 | 29.8 | 33.3 | 34.9 | 36.3 |
| GATESHEAD (5KF)                       | 45.2 | 46.9 | 46.6 | 46.7 | 49.4 | 51.2 |
| GLOUCESTERSHIRE (5QH)                 | 34.8 | 35.6 | 33.8 | 36.0 | 38.1 | 40.4 |
| GREAT YARMOUTH & WAVENEY (5PR)        | 41.6 | 39.7 | 37.5 | 40.3 | 42.3 | 46.3 |
| GREENWICH TEACHING (5A8)              | 37.5 | 39.5 | 38.2 | 44.9 | 47.7 | 51.1 |
| HALTON & ST.HELENS (5NM)              | 40.2 | 41.6 | 42.7 | 43.4 | 46.7 | 51.0 |
| HAMMERSMITH & FULHAM (5H1)            | 28.6 | 26.7 | 26.3 | 30.0 | 31.9 | 31.4 |
| HAMPSHIRE (5QC)                       | 42.0 | 42.8 | 41.6 | 43.3 | 44.5 | 44.6 |
| HARINGEY TEACHING (5C9)               | 36.7 | 37.2 | 37.4 | 39.3 | 42.0 | 44.7 |
| HARROW (5K6)                          | 31.5 | 31.0 | 27.7 | 29.2 | 31.0 | 32.1 |
| HARTLEPOOL (5D9)                      | 32.7 | 32.0 | 31.6 | 36.4 | 38.6 | 42.9 |
| HASTINGS & ROTHER (5P8)               | 38.6 | 38.0 | 36.2 | 38.0 | 39.8 | 41.7 |
| HAVERING (5A4)                        | 34.2 | 34.1 | 34.1 | 34.7 | 35.4 | 39.1 |
| HEART OF BIRMINGHAM (5MX)             | 31.8 | 29.9 | 29.5 | 33.1 | 37.6 | 43.2 |
| HEREFORDSHIRE (5CN)                   | 31.2 | 31.6 | 29.1 | 32.1 | 32.8 | 33.4 |
| HEYWOOD, MIDDLETON & ROCHDALE (5NQ)   | 41.5 | 42.3 | 40.9 | 42.4 | 45.3 | 46.2 |
| HILLINGDON (5AT)                      | 24.8 | 27.0 | 26.5 | 29.4 | 32.0 | 32.7 |
| HOUNSLOW (5HY)                        | 42.8 | 42.7 | 42.3 | 43.5 | 45.8 | 45.8 |
| HULL TEACHING (5NX)                   | 30.4 | 30.1 | 29.6 | 33.0 | 35.5 | 39.9 |
| ISLE OF WIGHT NHS (5QT)               | 33.1 | 33.9 | 33.0 | 34.5 | 35.9 | 38.9 |
| ISLINGTON (5K8)                       | 50.9 | 55.2 | 52.0 | 56.3 | 60.7 | 67.4 |
| KENSINGTON & CHELSEA (5LA)            | 25.7 | 24.8 | 26.2 | 29.6 | 30.3 | 29.6 |
| KINGSTON (5A5)                        | 35.5 | 34.0 | 29.8 | 36.1 | 37.2 | 38.1 |
| KIRKLEES (5N2)                        | 38.5 | 42.0 | 40.2 | 41.9 | 44.5 | 47.2 |
| KNOWSLEY (5J4)                        | 44.5 | 47.4 | 50.5 | 54.8 | 54.8 | 52.1 |
| LAMBETH (5LD)                         | 44.4 | 49.6 | 46.1 | 52.6 | 54.3 | 56.1 |
| LEEDS (5N1)                           | 39.1 | 38.5 | 36.6 | 42.5 | 44.8 | 47.1 |
| LEICESTER CITY (5PC)                  | 39.3 | 41.1 | 41.9 | 45.7 | 49.2 | 52.9 |
| LEICESTERSHIRE COUNTY & RUTLAND (5PA) | 30.8 | 32.0 | 31.2 | 32.6 | 34.9 | 36.6 |
| LEWISHAM (5LF)                        | 39.9 | 40.6 | 39.1 | 45.8 | 48.2 | 52.1 |
| LINCOLNSHIRE TEACHING (5N9)           | 34.4 | 35.4 | 33.3 | 36.3 | 38.1 | 39.7 |
| LIVERPOOL (5NL)                       | 45.1 | 45.2 | 44.3 | 47.8 | 51.0 | 52.7 |
| LUTON (5GC)                           | 38.3 | 36.0 | 32.9 | 34.9 | 36.9 | 38.8 |
| MANCHESTER (5NT)                      | 46.1 | 45.2 | 43.1 | 44.2 | 47.2 | 50.7 |
| MEDWAY (5L3)                          | 34.2 | 35.2 | 36.5 | 39.1 | 41.9 | 43.8 |

|                                               |      |      |      |      |      |      |
|-----------------------------------------------|------|------|------|------|------|------|
| MID ESSEX (5PX)                               | 31.2 | 30.9 | 30.2 | 33.7 | 35.8 | 38.3 |
| MIDDLESBROUGH (5KM)                           | 36.1 | 32.9 | 33.6 | 38.5 | 41.3 | 43.5 |
| MILTON KEYNES (5CQ)                           | 38.2 | 38.0 | 38.1 | 37.2 | 38.4 | 38.2 |
| NEWCASTLE (5D7)                               | 42.7 | 41.6 | 41.2 | 41.9 | 43.6 | 43.6 |
| NEWHAM (5C5)                                  | 48.7 | 48.7 | 48.1 | 54.5 | 57.5 | 61.3 |
| NORFOLK (5PQ)                                 | 30.5 | 31.2 | 30.6 | 32.1 | 33.6 | 34.3 |
| NORTH EAST ESSEX (5PW)                        | 26.6 | 26.9 | 26.1 | 28.6 | 29.8 | 30.8 |
| NORTH EAST LINCOLNSHIRE CARE TRUST PLUS (5ZU) | 31.4 | 31.4 | 32.3 | 37.2 | 38.6 | 44.9 |
| NORTH LANCASHIRE TEACHING PCT (5NF)           | 40.0 | 39.2 | 38.2 | 39.5 | 41.4 | 41.7 |
| NORTH LINCOLNSHIRE (5EF)                      | 33.6 | 34.3 | 33.6 | 34.4 | 35.4 | 36.6 |
| NORTH SOMERSET (5M8)                          | 35.5 | 35.3 | 35.6 | 38.0 | 39.7 | 40.2 |
| NORTH STAFFORDSHIRE (5PH)                     | 30.4 | 32.3 | 31.5 | 34.5 | 36.2 | 38.3 |
| NORTH TYNESIDE (5D8)                          | 43.0 | 45.8 | 44.3 | 44.8 | 47.3 | 48.2 |
| NORTH YORKSHIRE & YORK (5NV)                  | 37.6 | 37.4 | 35.5 | 37.6 | 39.3 | 40.7 |
| NORTHAMPTONSHIRE TEACHING (5PD)               | 37.3 | 39.2 | 36.9 | 39.7 | 42.1 | 43.6 |
| NORTHUMBERLAND CARE TRUST (5ZZ)               | 35.4 | 34.7 | 34.2 | 37.4 | 38.2 | 40.7 |
| NOTTINGHAM CITY (5EM)                         | 44.8 | 45.0 | 44.6 | 47.1 | 50.8 | 53.6 |
| NOTTINGHAMSHIRE COUNTY TEACHING (5N8)         | 35.0 | 35.5 | 34.5 | 36.5 | 38.4 | 41.9 |
| OLDHAM (5J5)                                  | 42.6 | 44.9 | 42.6 | 46.4 | 48.0 | 49.9 |
| OXFORDSHIRE (5QE)                             | 37.2 | 36.4 | 34.6 | 33.9 | 35.9 | 37.8 |
| PETERBOROUGH (5PN)                            | 29.8 | 33.2 | 34.4 | 35.9 | 36.4 | 38.2 |
| PLYMOUTH TEACHING (5F1)                       | 34.4 | 35.8 | 34.1 | 35.1 | 36.4 | 39.5 |
| PORTSMOUTH CITY TEACHING (5FE)                | 44.5 | 43.9 | 45.2 | 49.4 | 52.9 | 56.7 |
| REDBRIDGE (5NA)                               | 26.2 | 31.0 | 29.2 | 34.8 | 37.6 | 36.2 |
| REDCAR & CLEVELAND (5QR)                      | 33.8 | 36.4 | 35.2 | 35.1 | 38.0 | 42.8 |
| RICHMOND & TWICKENHAM (5M6)                   | 32.5 | 33.1 | 34.3 | 35.3 | 37.5 | 41.3 |
| ROTHERHAM (5H8)                               | 40.5 | 42.8 | 42.1 | 47.8 | 49.1 | 51.6 |
| SALFORD (5F5)                                 | 35.9 | 37.8 | 38.1 | 39.7 | 42.6 | 43.0 |
| SANDWELL (5PF)                                | 41.8 | 43.4 | 41.3 | 43.3 | 45.3 | 49.0 |
| SEFTON (5NJ)                                  | 39.8 | 40.7 | 39.3 | 42.0 | 43.8 | 45.0 |
| SHEFFIELD (5N4)                               | 43.8 | 46.9 | 47.5 | 49.6 | 53.2 | 56.7 |
| SHROPSHIRE COUNTY (5M2)                       | 38.3 | 37.1 | 34.5 | 36.1 | 37.3 | 39.5 |
| SOLIHULL CARE TRUST (5ZV)                     | 32.2 | 32.2 | 32.0 | 34.4 | 35.5 | 37.6 |
| SOMERSET (5QL)                                | 30.0 | 30.2 | 29.2 | 32.8 | 33.7 | 36.3 |
| SOUTH BIRMINGHAM (5M1)                        | 42.5 | 43.2 | 42.6 | 44.1 | 46.0 | 49.4 |
| SOUTH EAST ESSEX (5P1)                        | 33.7 | 35.6 | 32.5 | 32.9 | 34.5 | 35.4 |
| SOUTH GLOUCESTERSHIRE (5A3)                   | 32.1 | 30.6 | 31.8 | 33.8 | 34.6 | 35.6 |
| SOUTH STAFFORDSHIRE (5PK)                     | 36.5 | 36.4 | 35.3 | 36.5 | 37.5 | 38.3 |
| SOUTH TYNESIDE (5KG)                          | 43.3 | 45.9 | 44.3 | 47.1 | 50.9 | 53.7 |
| SOUTH WEST ESSEX (5PY)                        | 32.1 | 33.3 | 33.3 | 35.2 | 36.5 | 38.6 |
| SOUTHAMPTON CITY (5L1)                        | 42.0 | 43.0 | 44.5 | 45.5 | 49.2 | 49.7 |
| SOUTHWARK (5LE)                               | 38.1 | 37.2 | 32.2 | 33.5 | 36.1 | 38.3 |

|                                 |      |      |      |      |      |      |
|---------------------------------|------|------|------|------|------|------|
| STOCKPORT (5F7)                 | 41.4 | 41.1 | 38.6 | 40.2 | 41.5 | 44.3 |
| STOCKTON-ON-TEES TEACHING (5E1) | 38.8 | 38.5 | 38.1 | 37.8 | 40.1 | 39.2 |
| STOKE ON TRENT (5PJ)            | 37.8 | 36.9 | 35.4 | 39.3 | 41.8 | 47.1 |
| SUFFOLK (5PT)                   | 33.2 | 33.4 | 32.3 | 35.4 | 37.7 | 39.1 |
| SUNDERLAND TEACHING (5KL)       | 46.9 | 45.2 | 42.5 | 44.2 | 45.9 | 48.0 |
| SURREY (5P5)                    | 36.8 | 37.3 | 35.7 | 38.3 | 40.5 | 41.1 |
| SUTTON & MERTON (5M7)           | 31.5 | 33.1 | 31.4 | 32.7 | 34.3 | 34.9 |
| SWINDON (5K3)                   | 41.2 | 42.3 | 42.6 | 42.3 | 43.8 | 44.9 |
| TAMESIDE & GLOSSOP (5LH)        | 41.5 | 39.1 | 37.4 | 39.9 | 41.5 | 42.3 |
| TELFORD & WREKIN (5MK)          | 31.5 | 32.2 | 28.5 | 28.0 | 34.4 | 38.1 |
| TORBAY CARE TRUST (5ZW)         | 34.6 | 33.9 | 33.6 | 35.8 | 37.3 | 38.8 |
| TOWER HAMLETS (5C4)             | 34.7 | 37.8 | 32.7 | 37.5 | 41.2 | 40.3 |
| TRAFFORD (5NR)                  | 33.3 | 33.1 | 32.3 | 34.1 | 35.7 | 36.3 |
| WAKEFIELD DISTRICT (5N3)        | 43.4 | 43.7 | 40.8 | 42.5 | 43.7 | 45.0 |
| WALSALL TEACHING (5M3)          | 27.2 | 27.1 | 26.5 | 29.7 | 31.6 | 33.6 |
| WALTHAM FOREST (5NC)            | 40.3 | 44.4 | 39.3 | 45.7 | 49.6 | 54.7 |
| WANDSWORTH TEACHING PCT (5LG)   | 36.1 | 34.4 | 32.6 | 35.9 | 38.1 | 40.1 |
| WARRINGTON (5J2)                | 41.2 | 41.4 | 42.1 | 42.9 | 44.1 | 47.1 |
| WARWICKSHIRE (5PM)              | 36.9 | 37.1 | 35.3 | 36.5 | 38.0 | 39.0 |
| WEST ESSEX (5PV)                | 34.1 | 35.2 | 34.8 | 38.5 | 40.3 | 44.0 |
| WEST KENT (5P9)                 | 31.7 | 32.0 | 32.6 | 34.8 | 36.8 | 37.8 |
| WEST SUSSEX (5P6)               | 34.4 | 34.9 | 31.7 | 32.7 | 35.2 | 36.7 |
| WESTERN CHESHIRE (5NN)          | 39.9 | 39.4 | 37.7 | 41.2 | 43.2 | 43.6 |
| WESTMINSTER (5LC)               | 29.9 | 28.0 | 25.2 | 27.9 | 30.2 | 33.6 |
| WILTSHIRE (5QK)                 | 29.8 | 29.2 | 27.5 | 29.3 | 30.7 | 32.6 |
| WIRRAL (5NK)                    | 39.8 | 41.1 | 39.0 | 39.1 | 41.5 | 42.0 |
| WOLVERHAMPTON CITY (5MV)        | 32.1 | 34.3 | 35.8 | 38.2 | 39.7 | 40.9 |
| WORCESTERSHIRE (5PL)            | 35.0 | 34.6 | 32.4 | 34.3 | 35.7 | 37.0 |
